# Supplementary material for: Ruthenium-anchored zirconium dioxide derived from a metal–organic framework as a highly efficient pH-universal electrocatalyst for hydrogen evolution
Source: Royal Society of Chemistry journal article supplement (doi:10.1039/d5se01592h), 2025-12-26
Supplement: d5se01592h1.pdf [file d5se01592h1.pdf]

# **Ruthenium Anchored Zirconium Dioxide Derived from Metal-Organic Framework as a Highly Efficient pH-Universal Electrocatalyst for Hydrogen Evolution**

*Liyun Cao,<sup>\*a</sup> Wenchao Li,<sup>a</sup> Jianfeng Huang,<sup>\*a</sup> Dewei Chu,<sup>b</sup> Yijun Liu,<sup>c</sup> Faliang Luo,<sup>d</sup> Xuemeng Huo,<sup>a</sup> Dongping Wang,<sup>a</sup> Yongqiang Feng<sup>\*a</sup>*

<sup>a</sup>School of Material Science and Engineering, International S&T Cooperation Foundation of Shaanxi Province, Shaanxi University of Science and Technology, Xi'an, 710021, China

<sup>b</sup>School of Materials Science and Engineering, University of New South Wales, Sydney, NSW 2052, Australia

<sup>c</sup>Mona Lisa Group Co. Ltd., Foshan, Guangdong 528211, PR China

<sup>d</sup>State Key Laboratory of High-efficiency Coal Utilization and Green Chemical Engineering, College of Chemistry and Chemical Engineering, Ningxia University, Yinchuan, 750021, China

E-mail: caoliyun@sust.edu.cn; huangjf@sust.edu.cn; [fengyq@sust.edu.cn](mailto:fengyq@sust.edu.cn)

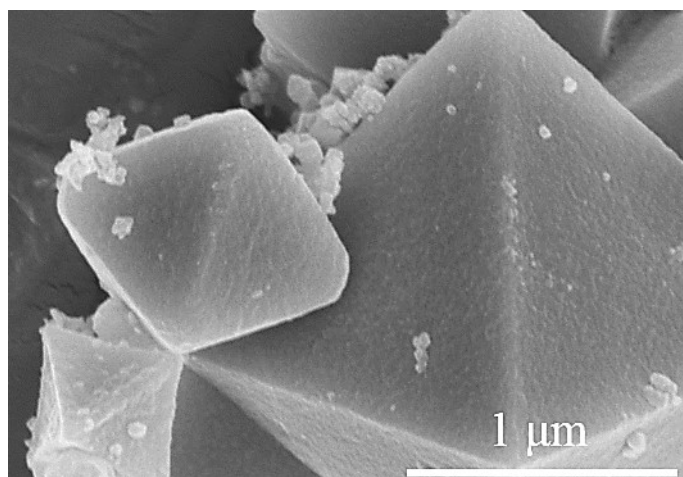

Fig. S1. SEM images of UiO-bpy.

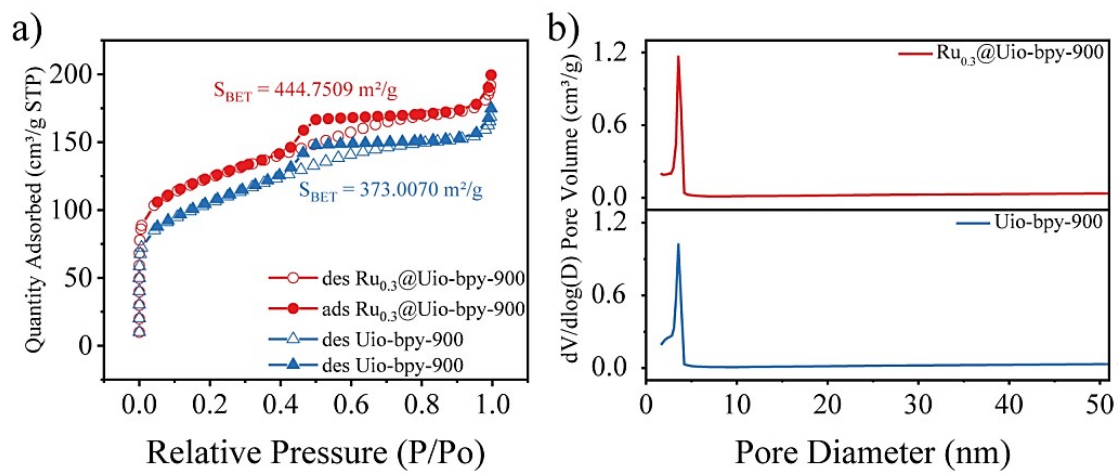

Fig. S2. (a) Nitrogen gas adsorption (solid) and desorption (empty) isothermal curves, (b) Corresponding pore size distribution curves of Ru<sub>0.3</sub>@UiO-bpy-900 and UiO-bpy-900.

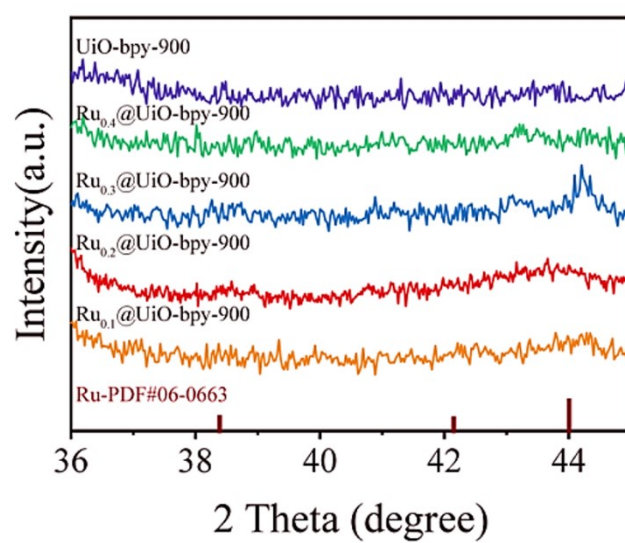

Fig. S3. XRD pattern of Ru<sub>x</sub>@UiO-bpy-900 (x = 0.1 , 0.2 , 0.3 and 0.4 mmol) in the diffraction angles from 36 to 45.

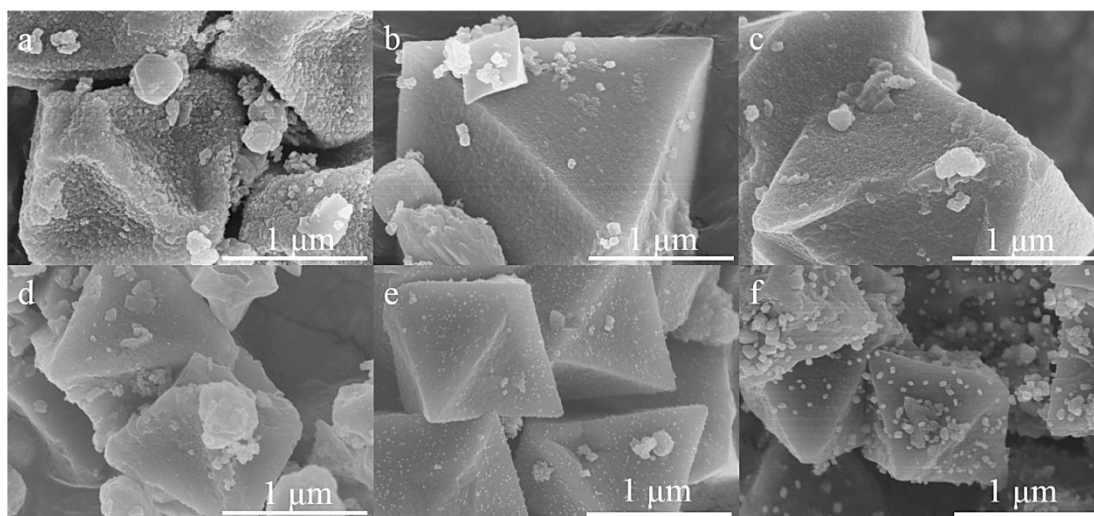

Fig. S4. SEM image of (a-c) Ru<sub>x</sub>@UiO-bpy (x=0.1, 0.2, 0.4) and (d-f) Ru<sub>x</sub>@UiO-bpy-900(x=0.1, 0.2, 0.4)

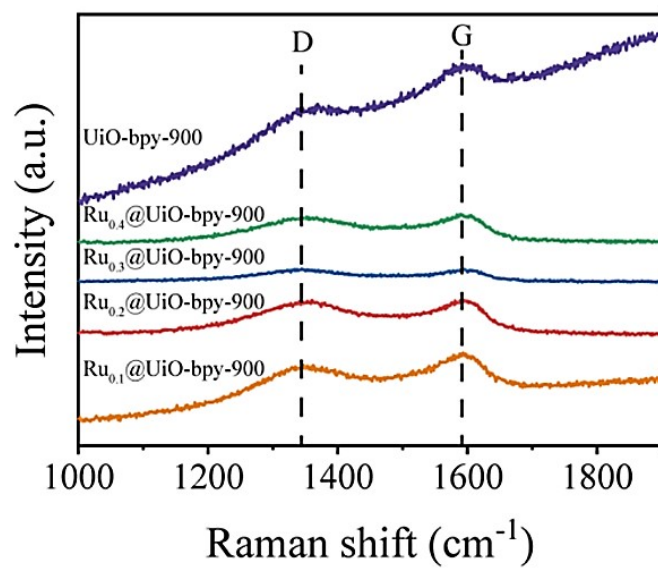

Fig. S5. Raman spectrum of Ru<sub>x</sub>@UiO-bpy-900 and UiO-bpy-900

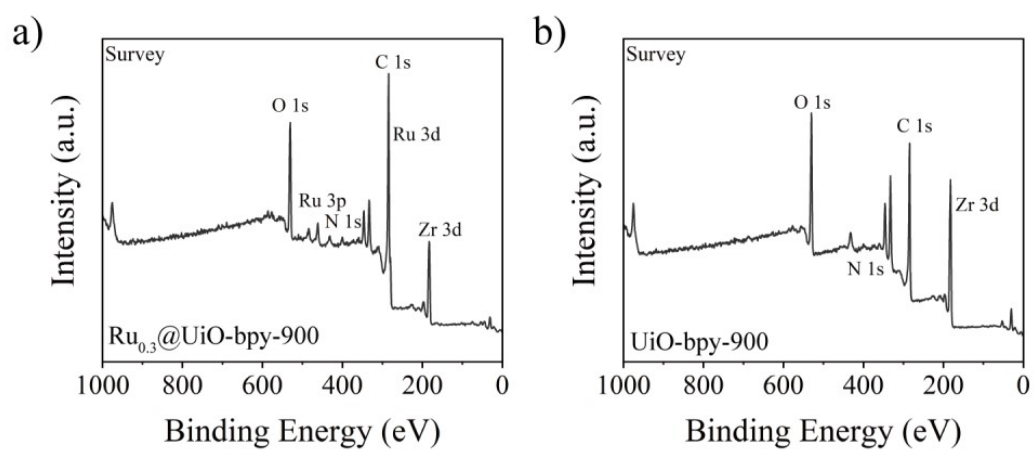

Fig. S6. XPS survey spectra of (a)  $\text{Ru}_{0.3}\text{@UiO-bpy-900}$  and (b) UiO-bpy-900

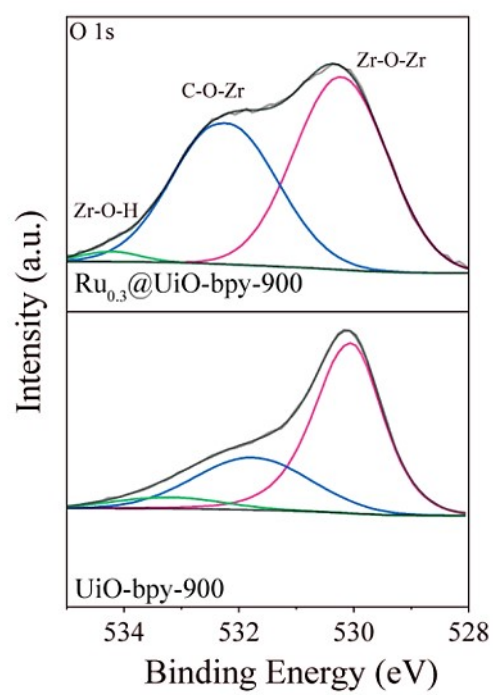

Fig. S7. O 1s of Ru<sub>0.3</sub>@UiO-bpy-900 and UiO-bpy-900.



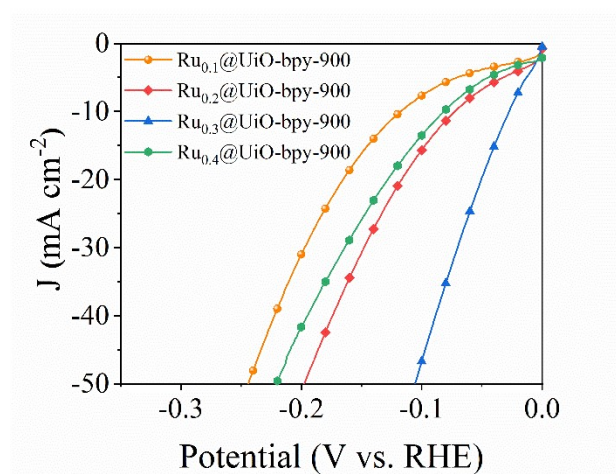

Fig. S8. LSV curve of  $\text{Ru}_x@UiO-bpy-900$  ( $x = 0.1, 0.2, 0.3$  and  $0.4$  mmol) in 1 M KOH

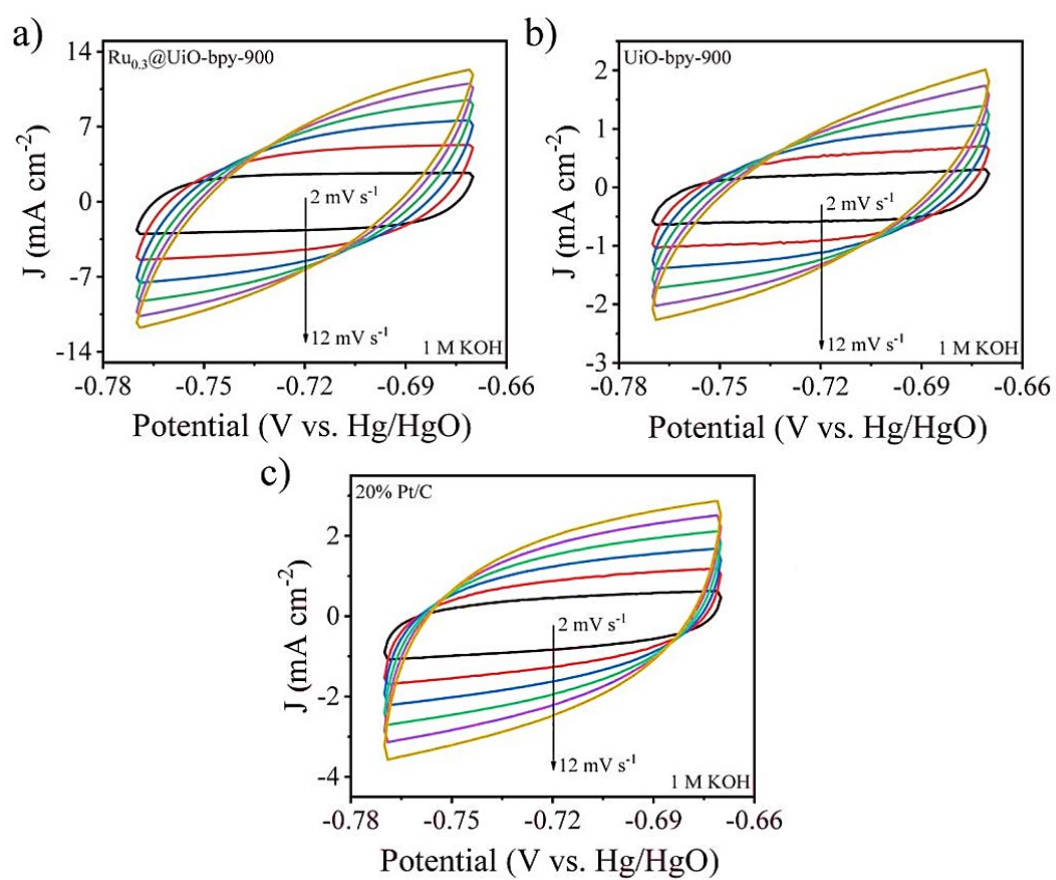

Fig. S9. CV curves with scan rates of 2, 4, 6, 8, 10 and 12  $\text{mV s}^{-1}$  of a)  $\text{Ru}_{0.3}@ \text{UiO-bpy-900}$ , b)  $\text{UiO-bpy-900}$ , c) 20% Pt/C in 1 M KOH

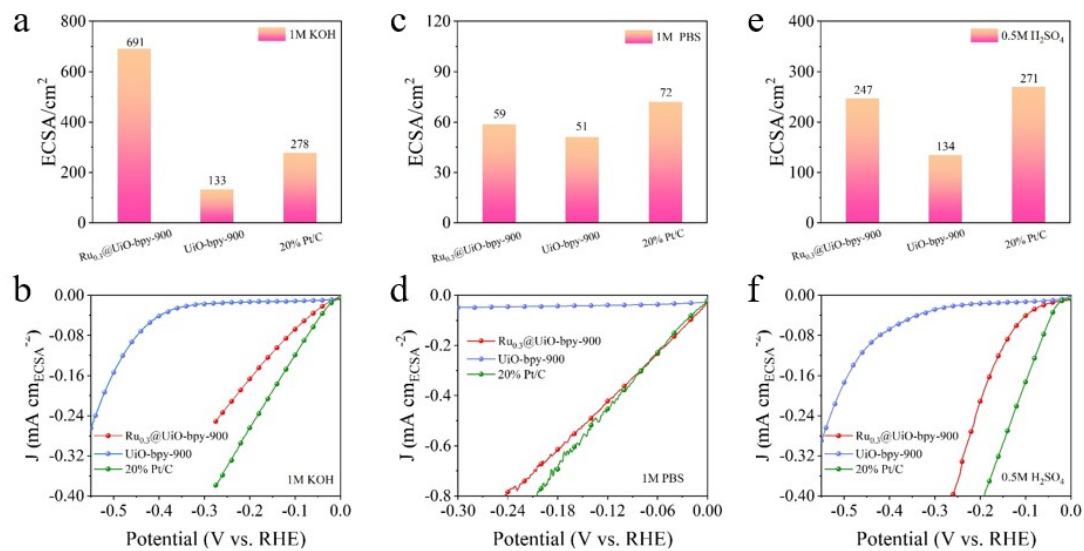

Fig. S10. The electrochemical active specific surface area and the ECSA-normalized LSV of  $\text{Ru}_{0.3}@/\text{UiO-bpy-900}$ ,  $\text{UiO-bpy-900}$  and commercial benchmark 20% Pt/C in different electrolytes. (a, b) 1 M KOH, (c, d) 1 M PBS, (e, f) 0.5 M  $\text{H}_2\text{SO}_4$ .

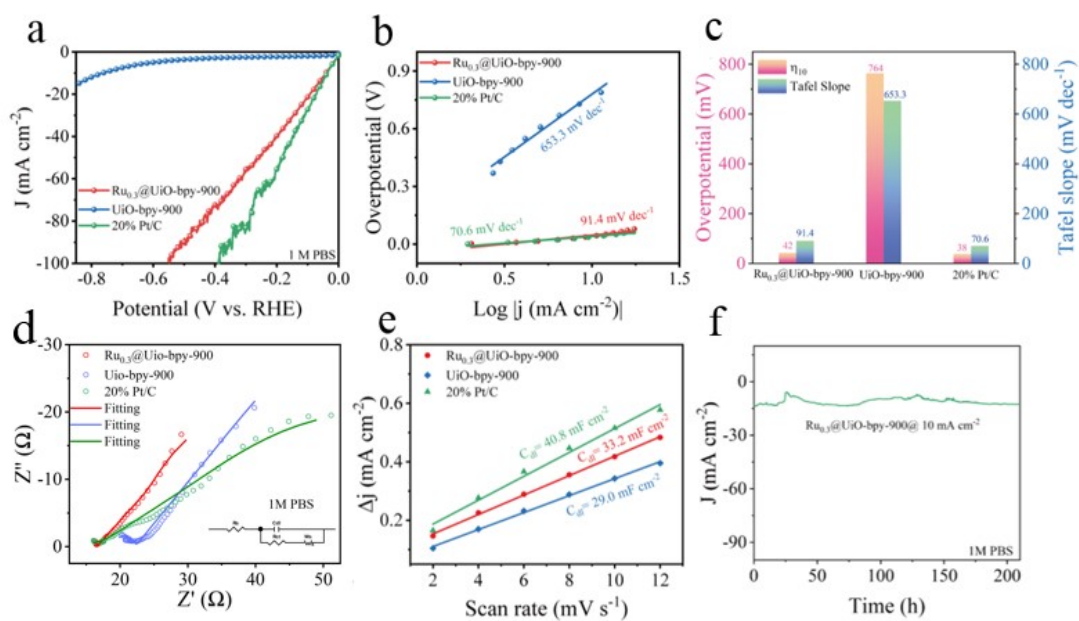

Fig. S11. Electrochemical HER performance in 1.0 M PBS. (a) The LSV curves, (b) Tafel plots, (c) the histograms of overpotential and Tafel slopes, (d) Nyquist plot and the fitting curves, (e) current density difference against scan rate of  $\text{Ru}_{0.3}@/\text{UiO-bpy-900}$ ,  $\text{UiO-bpy-900}$  and the commercial benchmark 20% Pt/C. (f) Long-term chronoamperometric test of  $\text{Ru}_{0.3}@/\text{UiO-bpy-900}$ .

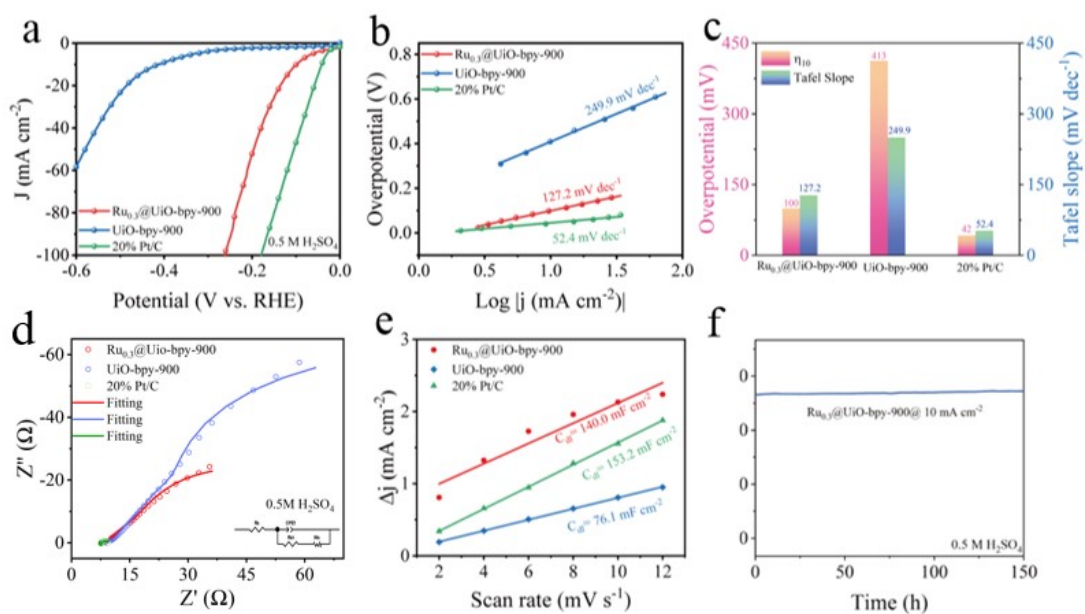

Fig. S12. Electrochemical HER performance in 0.5 M  $\text{H}_2\text{SO}_4$ . (a) The LSV curves, (b) Tafel plots, (c) the histograms of overpotential and Tafel slopes, (d) Nyquist plot and the fitting curves, (e) current density difference against scan rate of  $\text{Ru}_{0.3}/\text{UiO-bpy-900}$ ,  $\text{UiO-bpy-900}$  and the commercial benchmark 20% Pt/C. (f) Long-term chronoamperometric test of  $\text{Ru}_{0.3}/\text{UiO-bpy-900}$ .

**Table S1** EIS fitting parameters for Ru<sub>0.3</sub>@UiO-bpy-900, UiO-bpy-900, and Commercial 20% Pt/C in 1.0 M KOH

| Sample                         | Element | Value | Error % |
|--------------------------------|---------|-------|---------|
| Ru <sub>0.3</sub> @UiO-bpy-900 | Rs      | 1.437 | 4.964   |
|                                | Rct     | 15.32 | 1.5286  |
| UiO-bpy-900                    | Rs      | 1.241 | 7.0699  |
|                                | Rct     | 24    | 0.56654 |
| 20% Pt/C                       | Rs      | 1.502 | 5.282   |
|                                | Rct     | 15.89 | 1.1658  |
